# Supplementary material for: Synthesis of 2-aroylfuro[3,2-c]quinolines from quinolone-based chalcones and evaluation of their antioxidant and anticholinesterase activities
Source: Royal Society of Chemistry journal article supplement (doi:10.1039/d0nj00409j), 2020-01-01
Supplement: d0nj00409j1.pdf [file d0nj00409j1.pdf]

## Electronic Supporting Information

### **Synthesis of 2-arylfuro[3,2-*c*]quinolines from quinolone-based chalcones and evaluation of their antioxidant and anticholinesterase activities**

João P. S. Ferreira,<sup>a</sup> Susana M. Cardoso,<sup>a</sup> Filipe A. Almeida Paz,<sup>b</sup> Artur M. S. Silva,<sup>a</sup> Vera L. M. Silva<sup>\*a</sup>

<sup>a</sup>*LAQV-REQUIMTE, Department of Chemistry, University of Aveiro, 3810-193 Aveiro, Portugal.*

<sup>b</sup>*CICECO, Department of Chemistry, University of Aveiro, 3810-193 Aveiro, Portugal.*

## Table of Contents

|                                                                                                                         |     |
|-------------------------------------------------------------------------------------------------------------------------|-----|
| <b>1. NMR spectra</b> .....                                                                                             | S3  |
| <b>Figure S1.</b> <sup>1</sup> H NMR spectrum of compound <b>2a</b> (300.13 MHz, CDCl <sub>3</sub> ).....               | S3  |
| <b>Figure S2.</b> Expansion of <sup>1</sup> H NMR spectrum of compound <b>2a</b> (300.13 MHz, CDCl <sub>3</sub> ).....  | S3  |
| <b>Figure S3.</b> <sup>13</sup> C NMR spectrum of compound <b>2a</b> (75.47 MHz, CDCl <sub>3</sub> ).....               | S4  |
| <b>Figure S4.</b> <sup>1</sup> H NMR spectrum of compound <b>2b</b> (300.13 MHz, CDCl <sub>3</sub> ).....               | S4  |
| <b>Figure S5.</b> Expansion of <sup>1</sup> H NMR spectrum of compound <b>2b</b> (300.13 MHz, CDCl <sub>3</sub> ).....  | S5  |
| <b>Figure S6.</b> <sup>13</sup> C NMR spectrum of compound <b>2b</b> (75.47 MHz, CDCl <sub>3</sub> ).....               | S5  |
| <b>Figure S7.</b> <sup>1</sup> H NMR spectrum of compound <b>2c</b> (300.13 MHz, CDCl <sub>3</sub> ).....               | S6  |
| <b>Figure S8.</b> Expansion of <sup>1</sup> H NMR spectrum of compound <b>2c</b> (300.13 MHz, CDCl <sub>3</sub> ).....  | S6  |
| <b>Figure S9.</b> <sup>13</sup> C NMR spectrum of compound <b>2c</b> (75.47 MHz, CDCl <sub>3</sub> ).....               | S7  |
| <b>Figure S10.</b> <sup>1</sup> H NMR spectrum of compound <b>2d</b> (300.13 MHz, CDCl <sub>3</sub> ).....              | S7  |
| <b>Figure S11.</b> Expansion of <sup>1</sup> H NMR spectrum of compound <b>2d</b> (300.13 MHz, CDCl <sub>3</sub> )....  | S8  |
| <b>Figure S12.</b> <sup>13</sup> C NMR spectrum of compound <b>2d</b> (75.47 MHz, CDCl <sub>3</sub> ).....              | S8  |
| <b>Figure S13.</b> <sup>1</sup> H NMR spectrum of compound <b>2e</b> (300.13 MHz, CDCl <sub>3</sub> ).....              | S9  |
| <b>Figure S14.</b> Expansion of <sup>1</sup> H NMR spectrum of compound <b>2e</b> (300.13 MHz, CDCl <sub>3</sub> )..... | S9  |
| <b>Figure S15.</b> <sup>13</sup> C NMR spectrum of compound <b>2e</b> (75.47 MHz, CDCl <sub>3</sub> ).....              | S10 |
| <b>Figure S16.</b> <sup>1</sup> H NMR spectrum of compound <b>3</b> (300.13 MHz, CDCl <sub>3</sub> ).....               | S10 |
| <b>Figure S17.</b> Expansion of <sup>1</sup> H NMR spectrum of compound <b>3</b> (300.13 MHz, CDCl <sub>3</sub> ).....  | S11 |
| <b>Figure S18.</b> <sup>13</sup> C NMR spectrum of compound <b>3</b> (75.47 MHz, CDCl <sub>3</sub> ).....               | S11 |
| <b>2. Single-Crystal X-Ray Diffraction Studies</b> .....                                                                | S12 |
| <b>3. References</b> .....                                                                                              | S13 |

## 1. NMR spectra

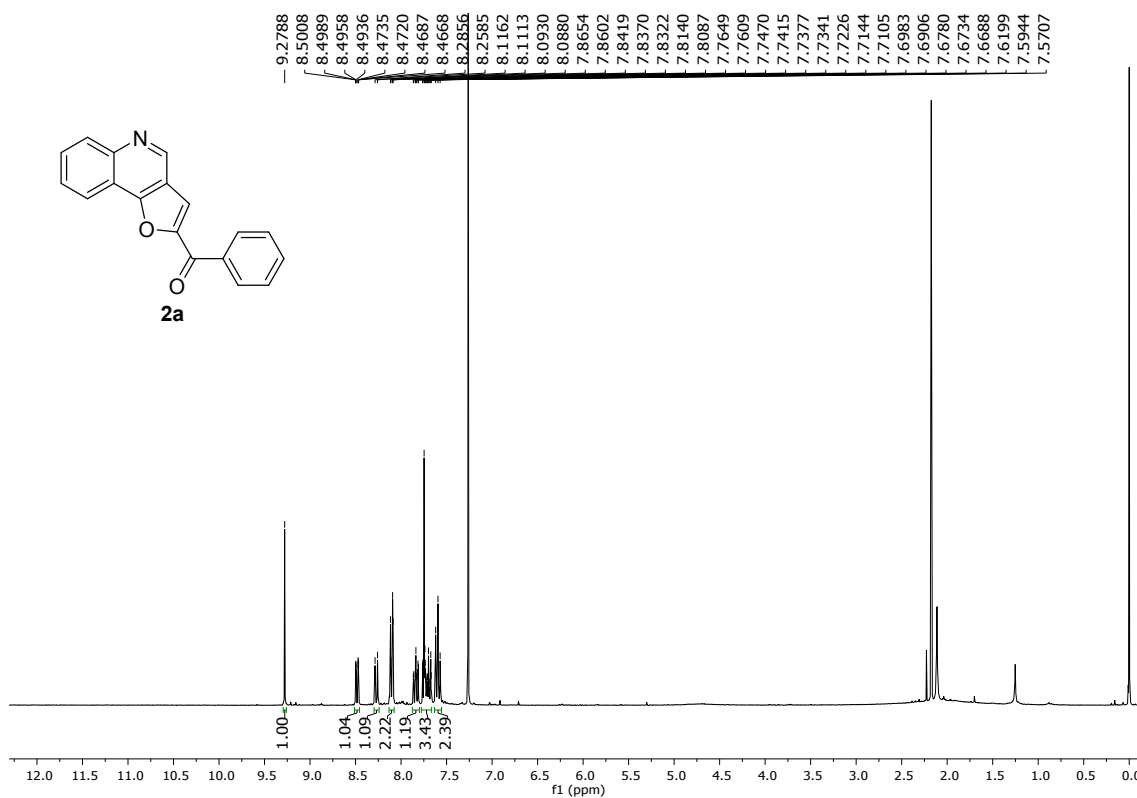

**Figure S1.**  $^1\text{H}$  NMR spectrum of compound **2a** (300.13 MHz,  $\text{CDCl}_3$ )

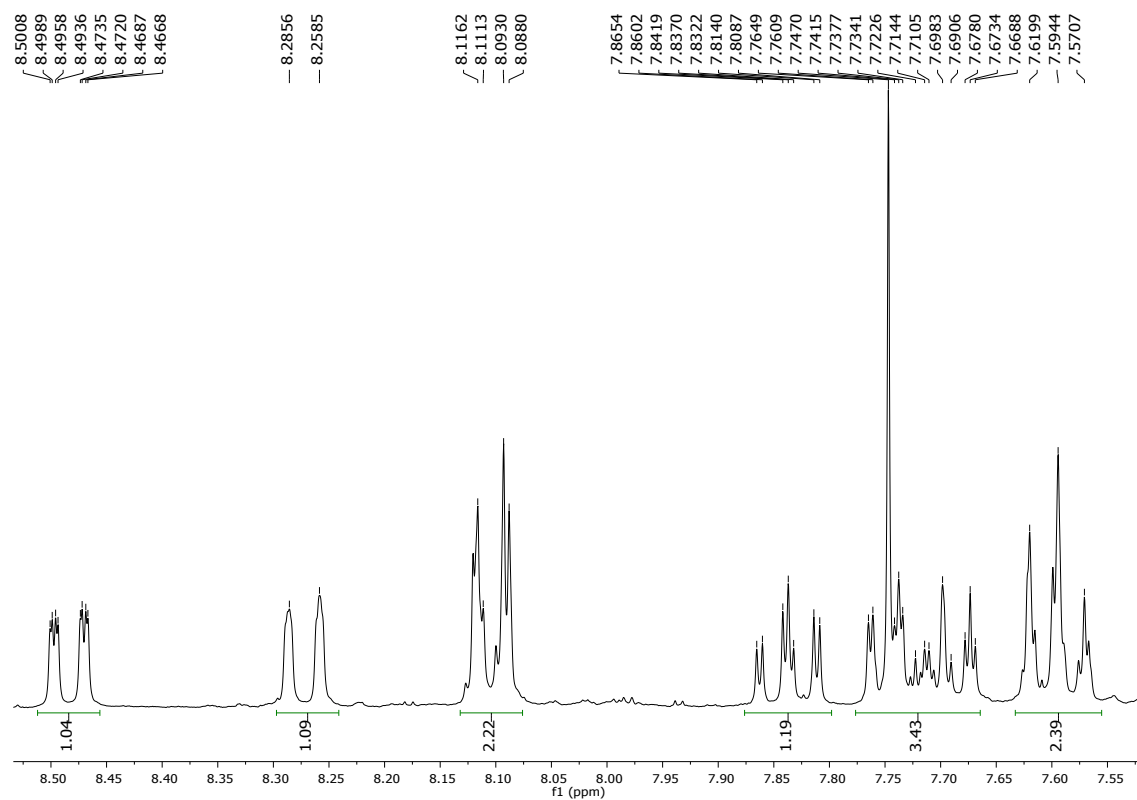

**Figure S2.** Expansion of  $^1\text{H}$  NMR spectrum of compound **2a** (300.13 MHz,  $\text{CDCl}_3$ )

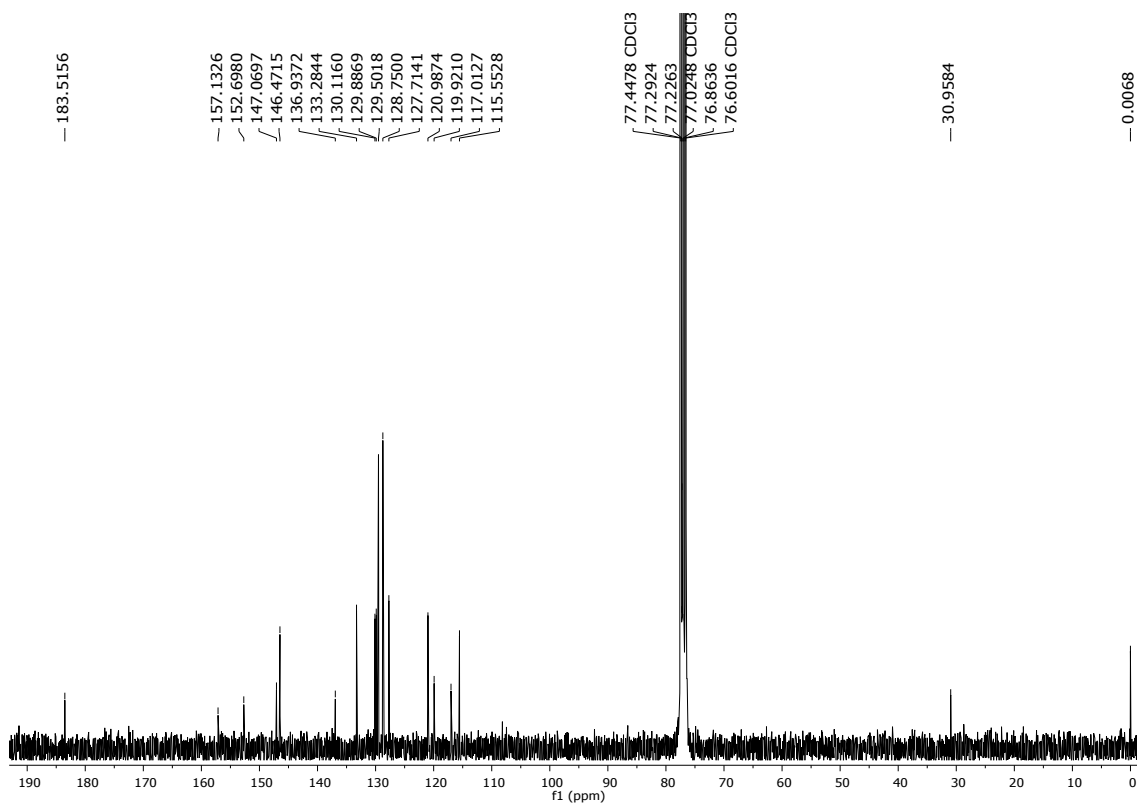

Figure S3. <sup>13</sup>C NMR spectrum of compound **2a** (75.47 MHz, CDCl<sub>3</sub>)

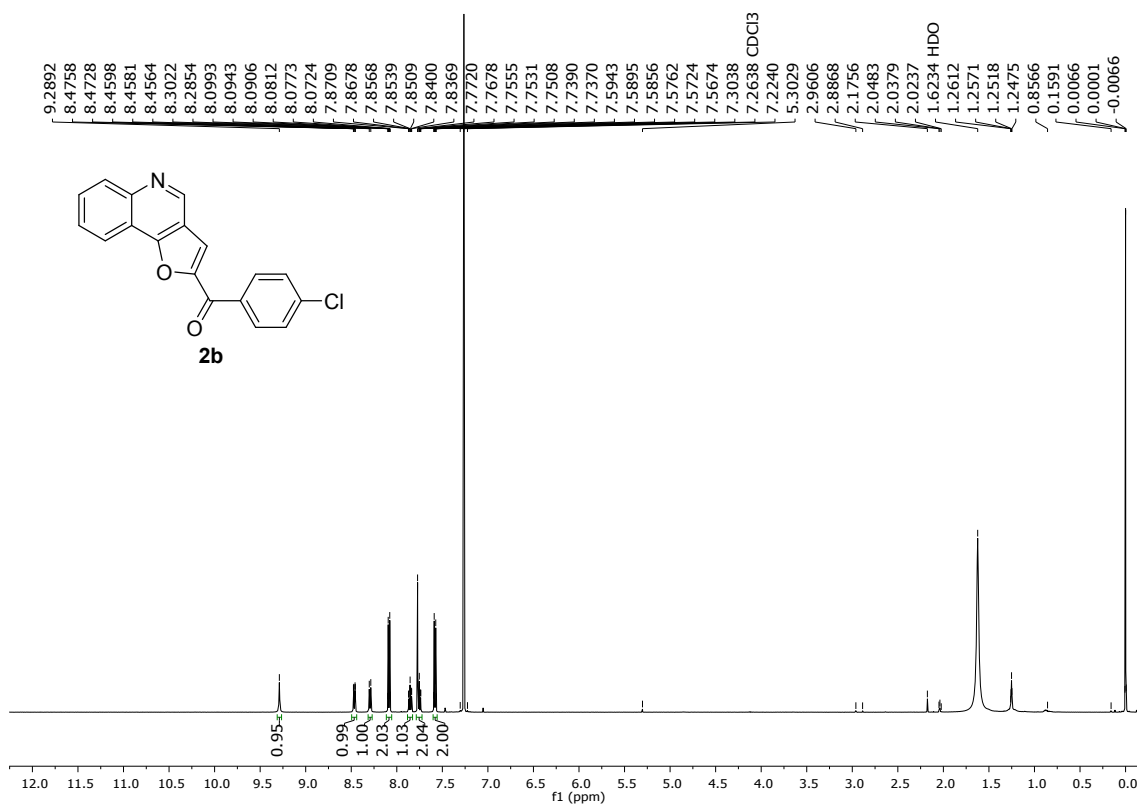

Figure S4. <sup>1</sup>H NMR spectrum of compound **2b** (300.13 MHz, CDCl<sub>3</sub>)

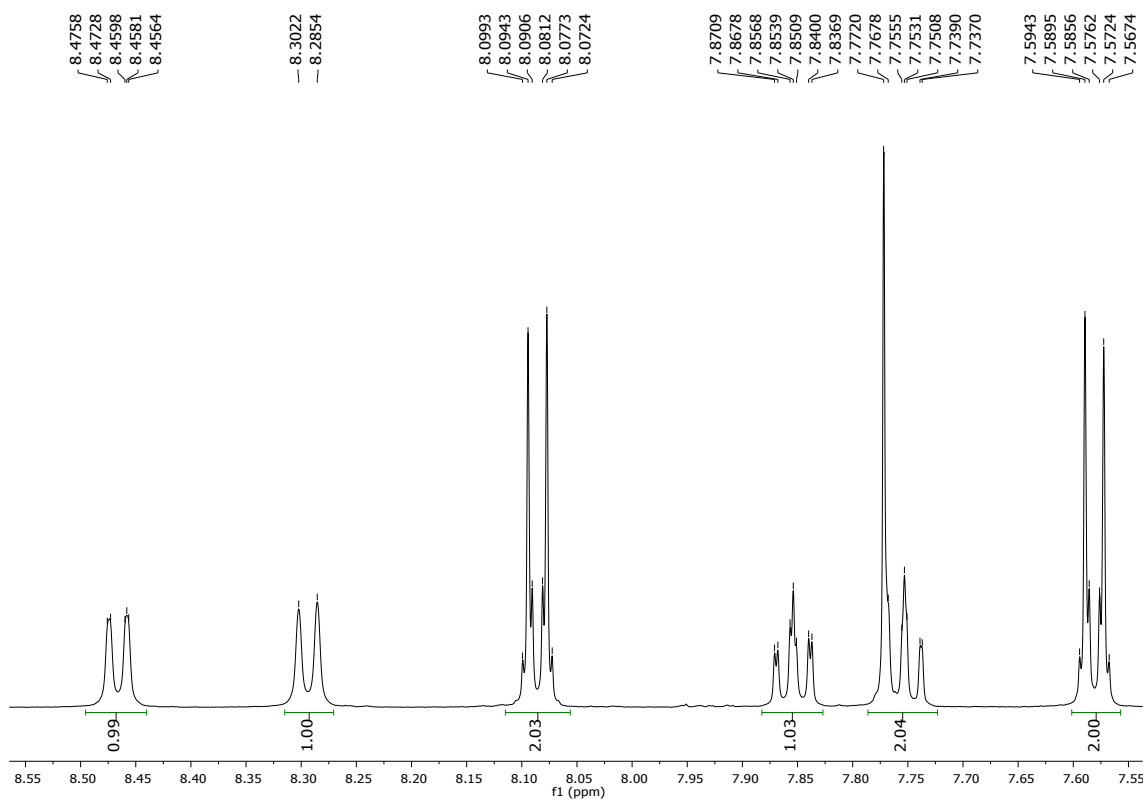

Figure S5. Expansion of  $^1\text{H}$  NMR spectrum of compound **2b** (300.13 MHz,  $\text{CDCl}_3$ )

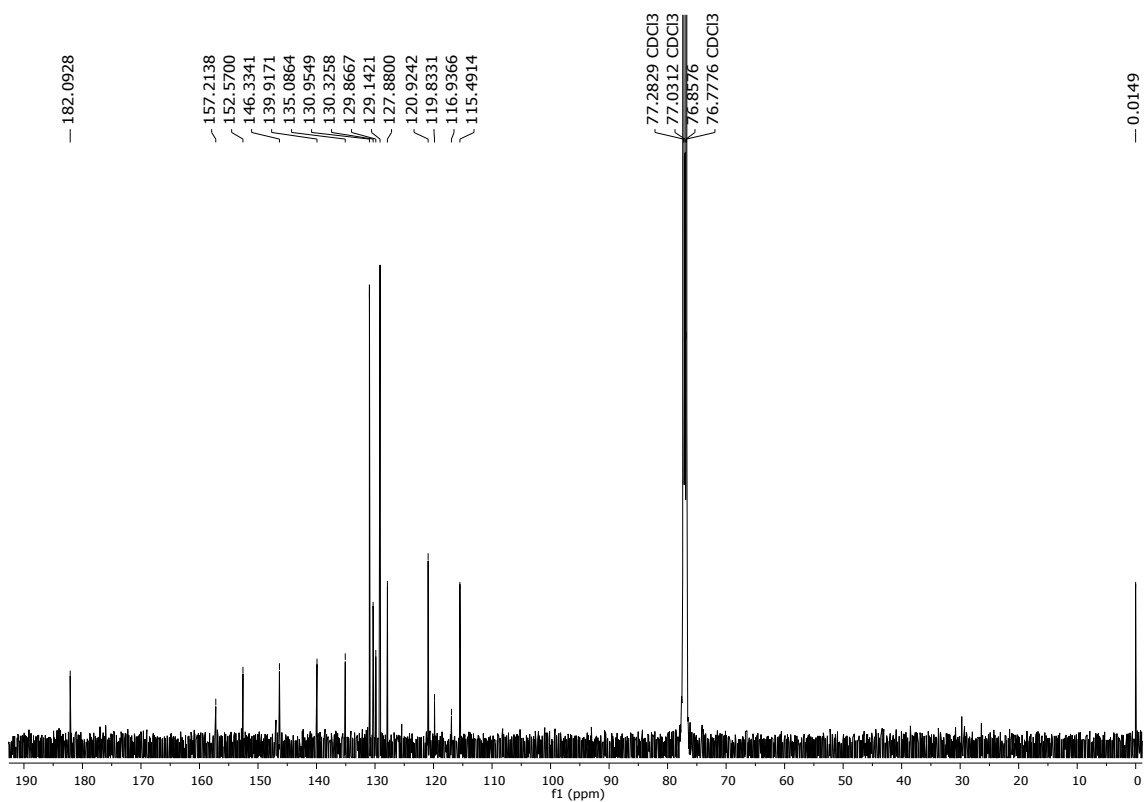

Figure S6.  $^{13}\text{C}$  NMR spectrum of compound **2b** (75.47 MHz,  $\text{CDCl}_3$ )

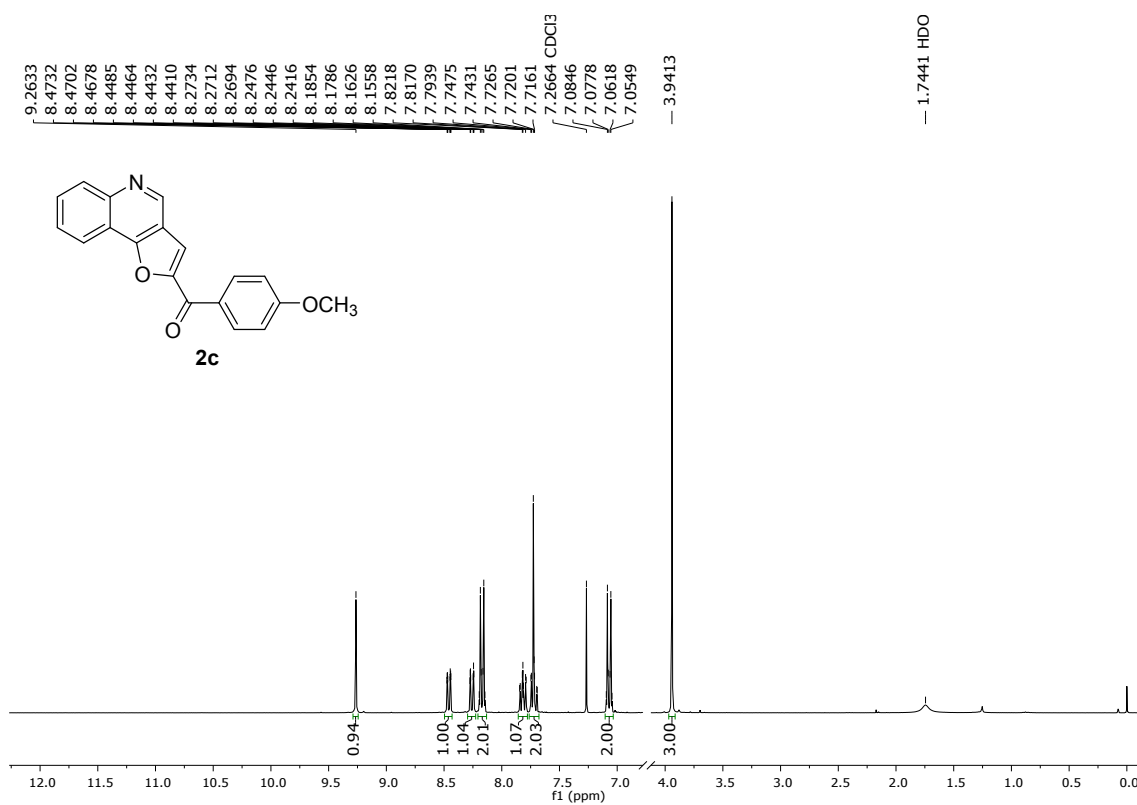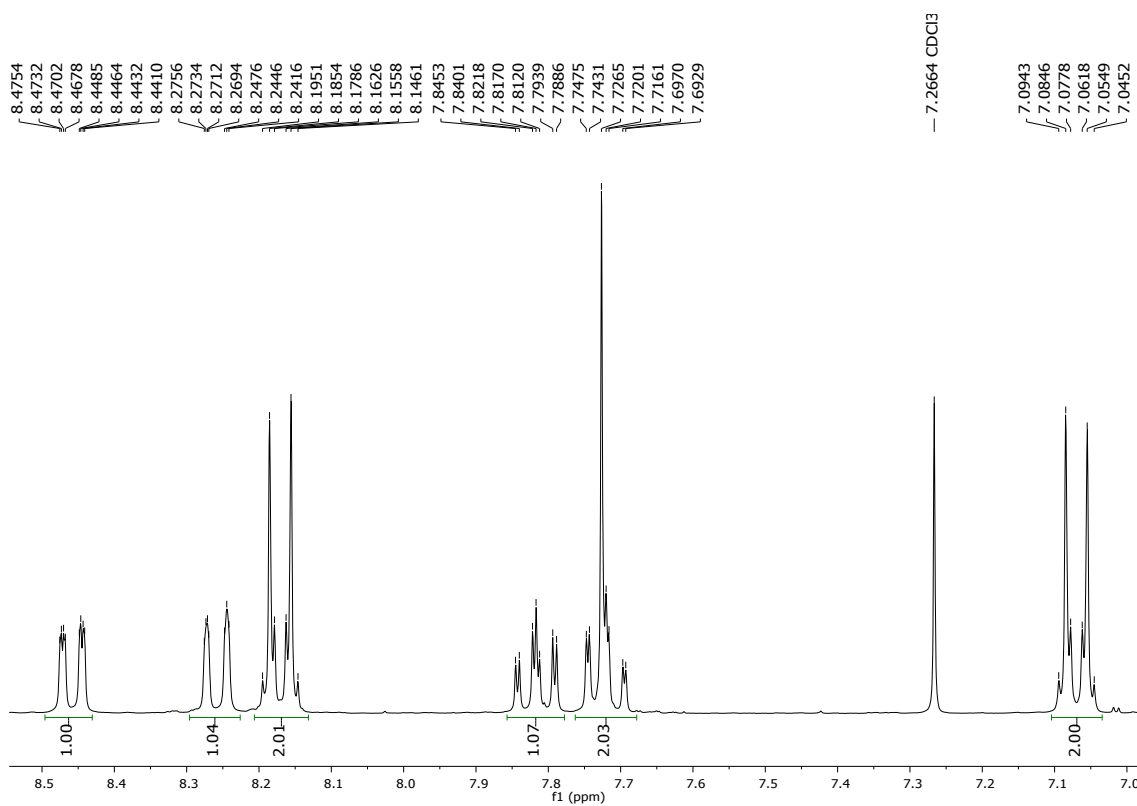

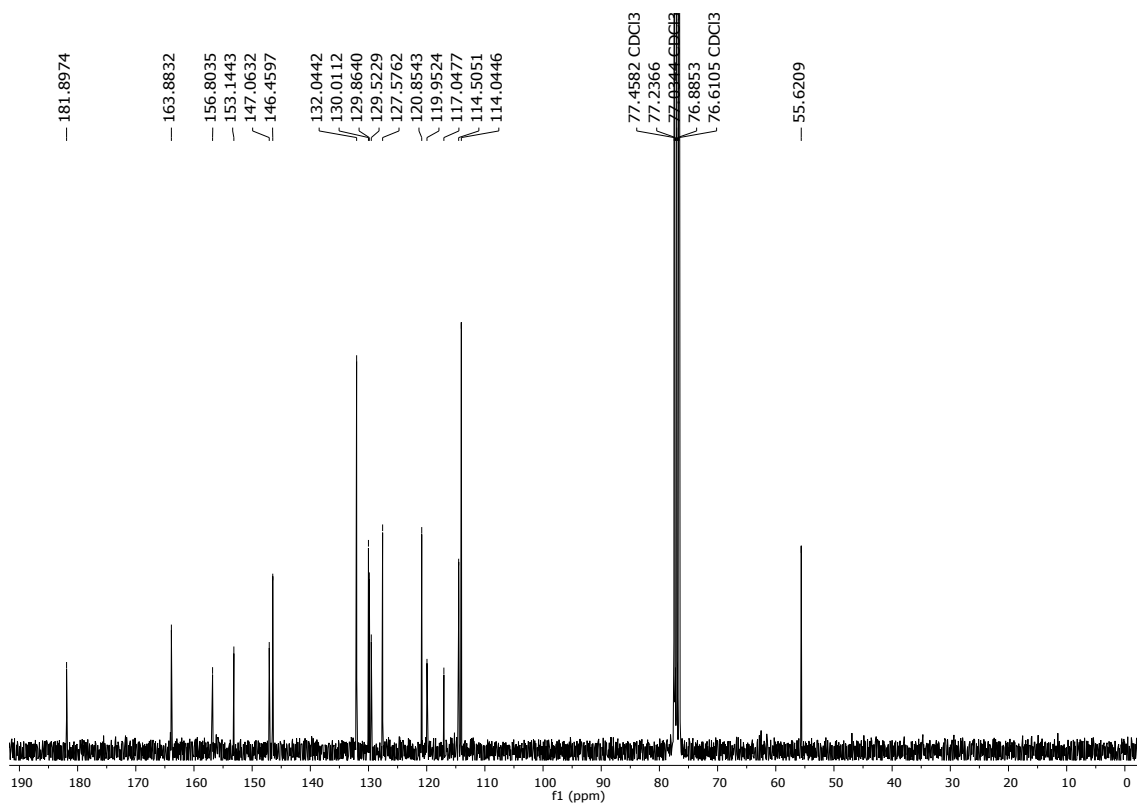

Figure S9.  $^{13}\text{C}$  NMR spectrum of compound **2c** (75.47 MHz,  $\text{CDCl}_3$ )

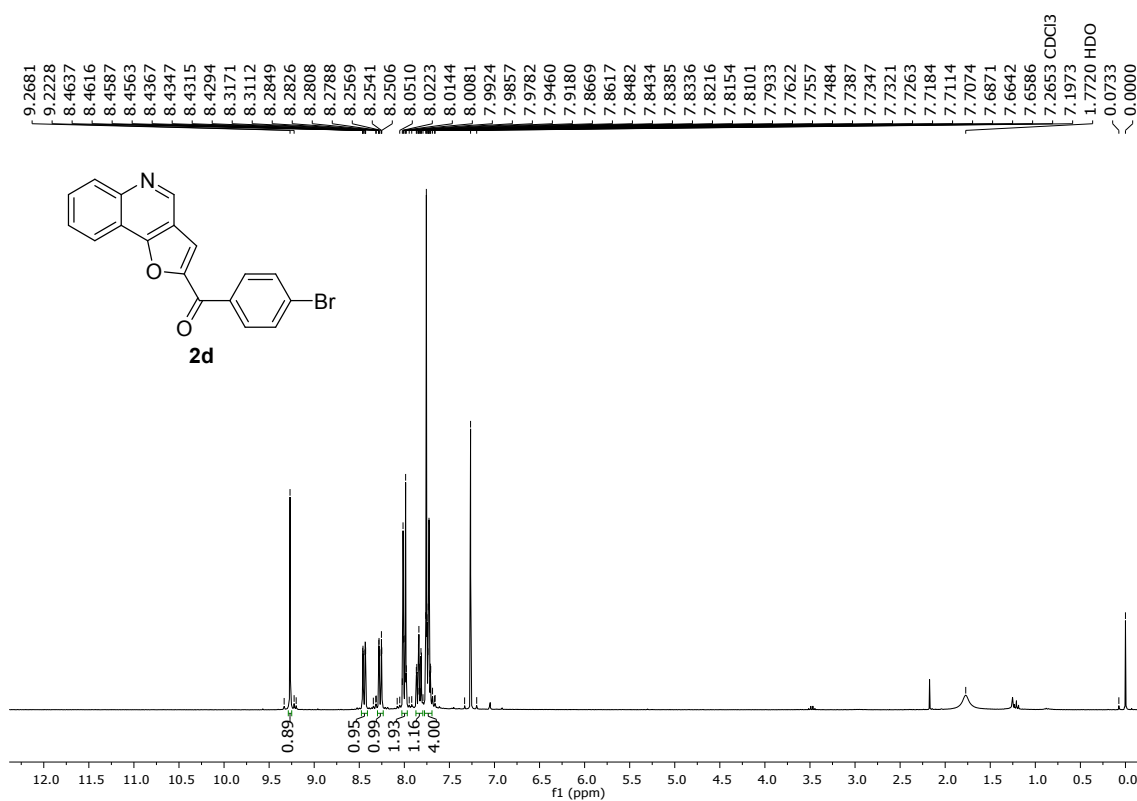

Figure S10.  $^1\text{H}$  NMR spectrum of compound **2d** (300.13 MHz,  $\text{CDCl}_3$ )

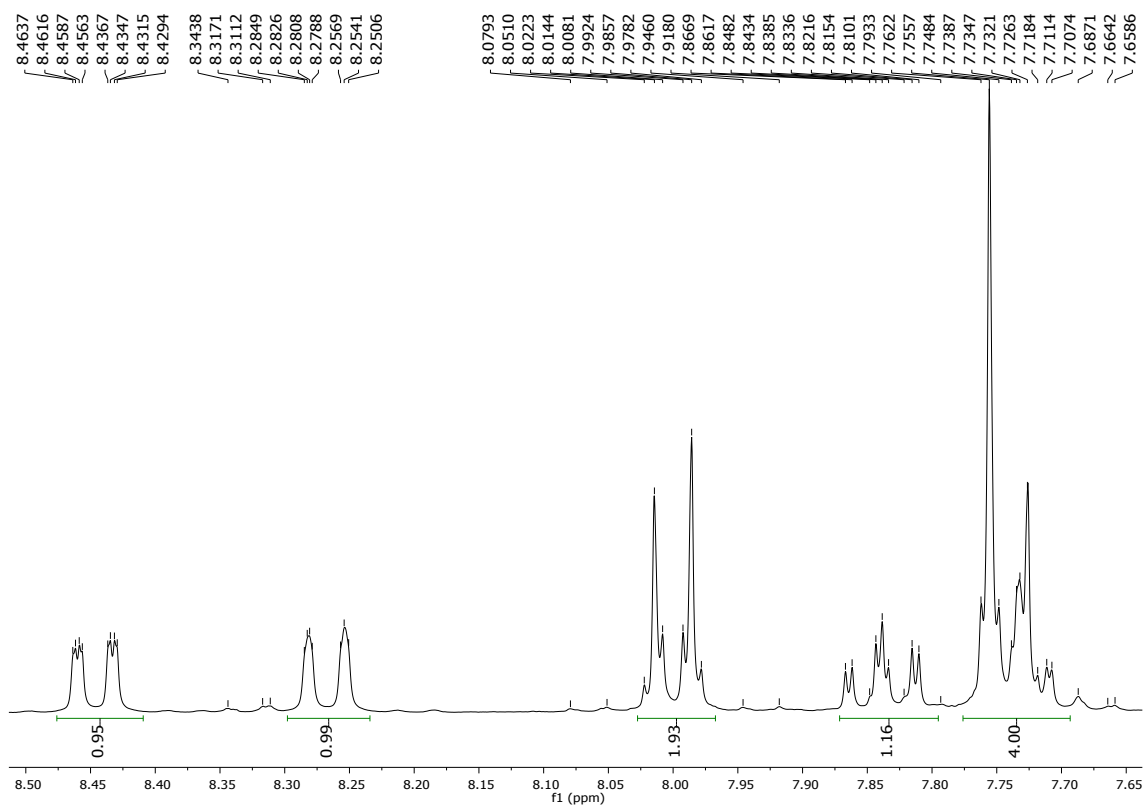

**Figure S11.** Expansion of  $^1\text{H}$  NMR spectrum of compound **2d** (300.13 MHz,  $\text{CDCl}_3$ )

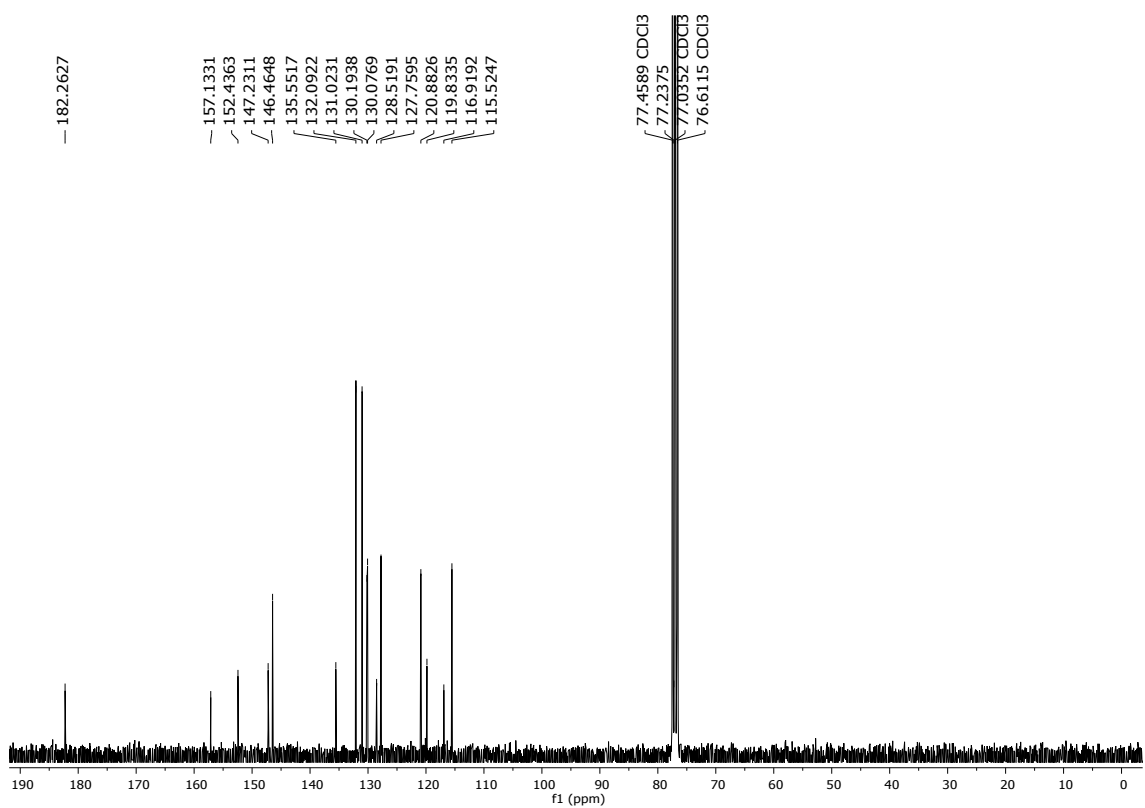

**Figure S12.**  $^{13}\text{C}$  NMR spectrum of compound **2d** (75.47 MHz,  $\text{CDCl}_3$ )



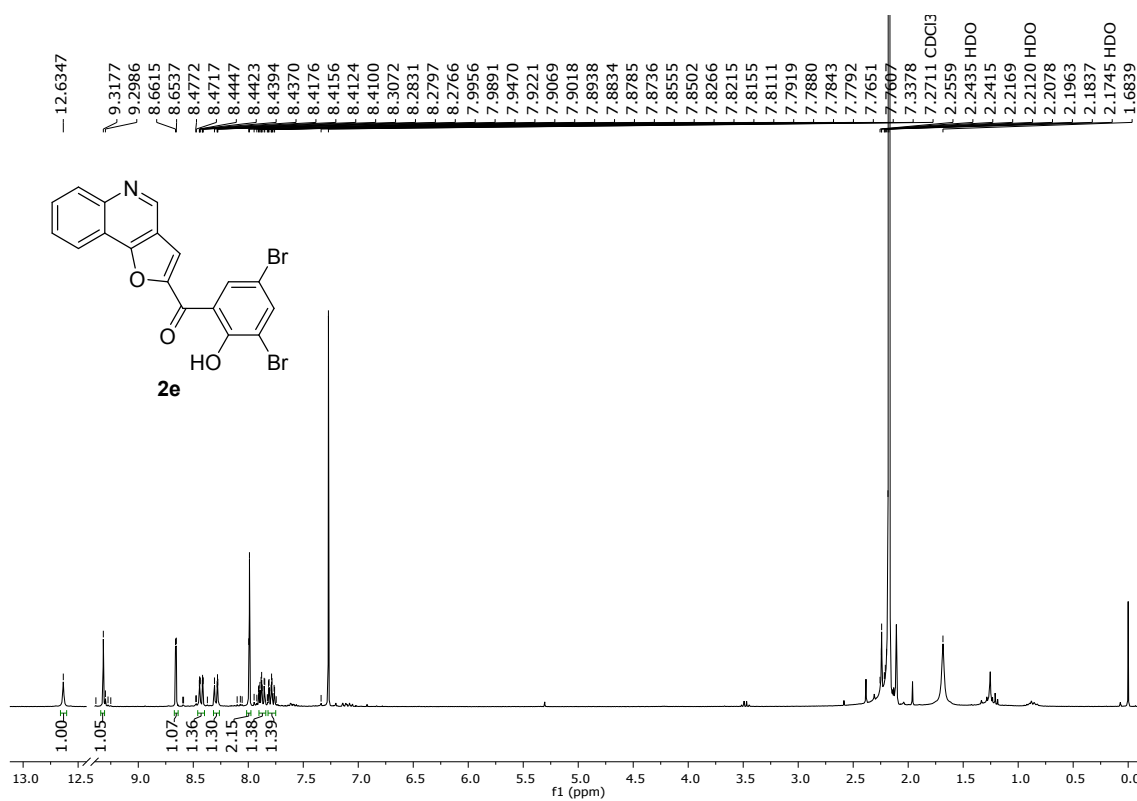

Figure S13. <sup>1</sup>H NMR spectrum of compound **2e** (300.13 MHz, CDCl<sub>3</sub>)

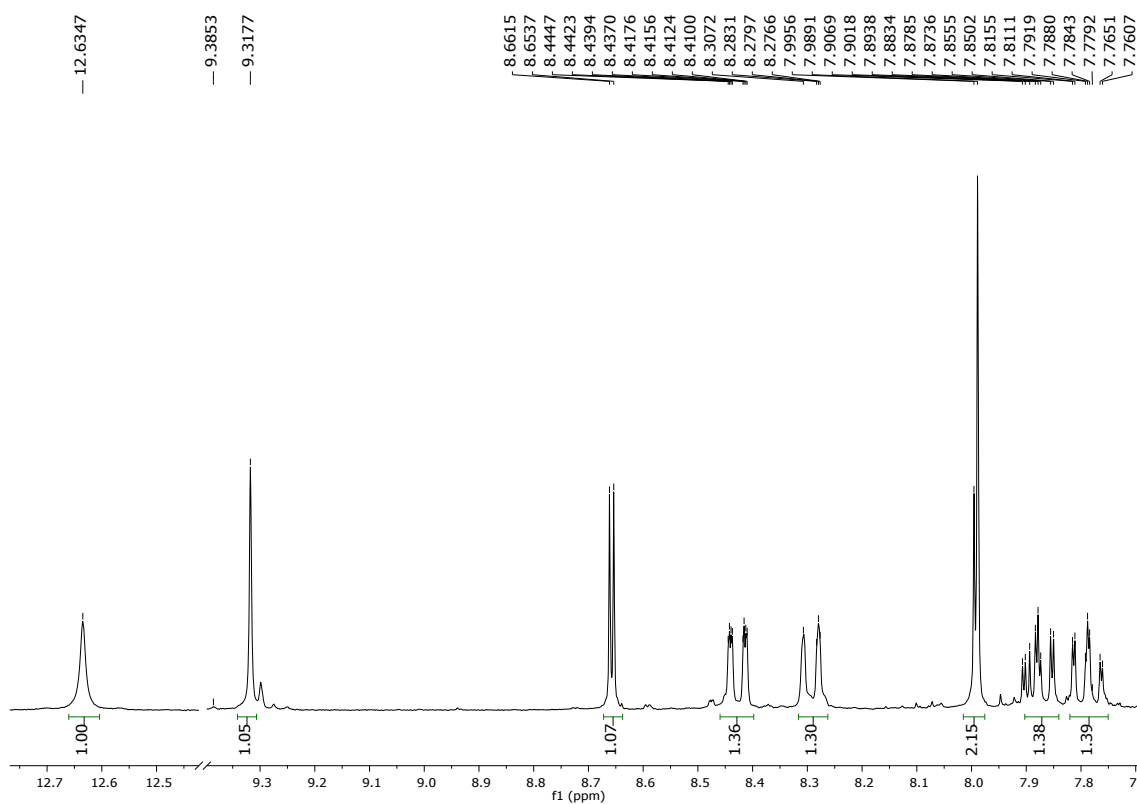

Figure S14. Expansion of <sup>1</sup>H NMR spectrum of compound **2e** (300.13 MHz, CDCl<sub>3</sub>)

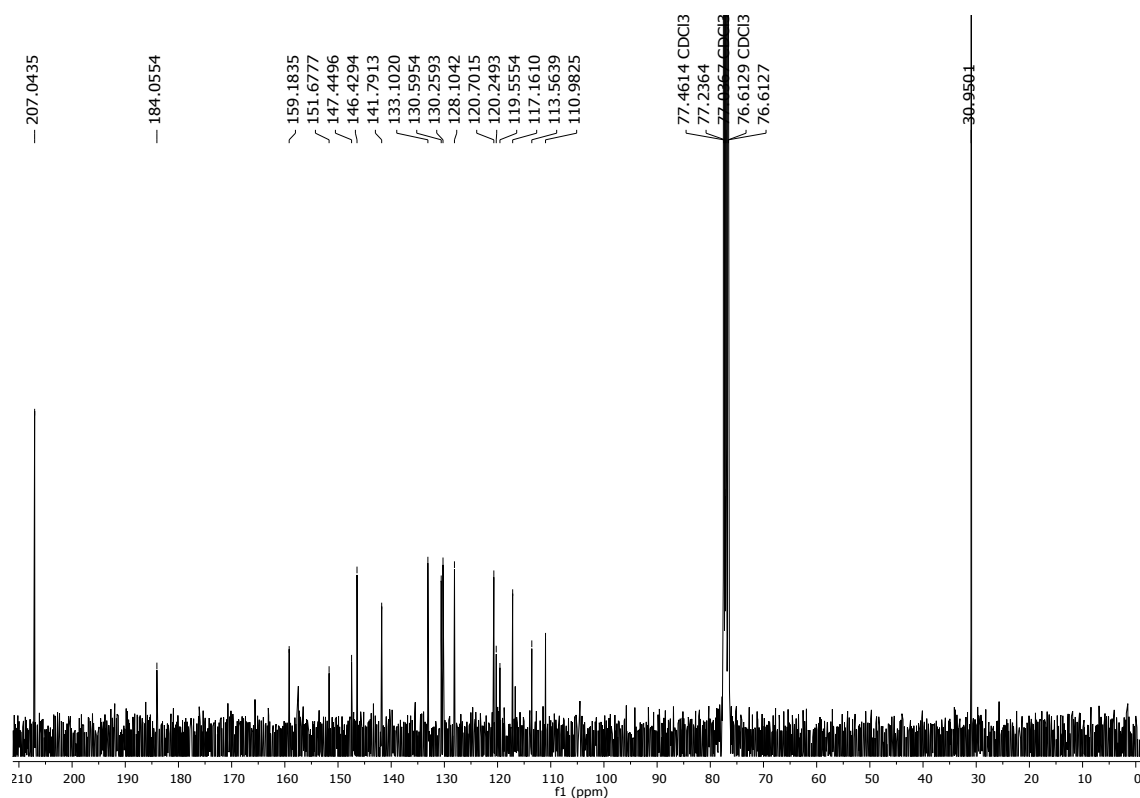

Figure S15.  $^{13}\text{C}$  NMR spectrum of compound **2e** (75.47 MHz,  $\text{CDCl}_3$ )\*

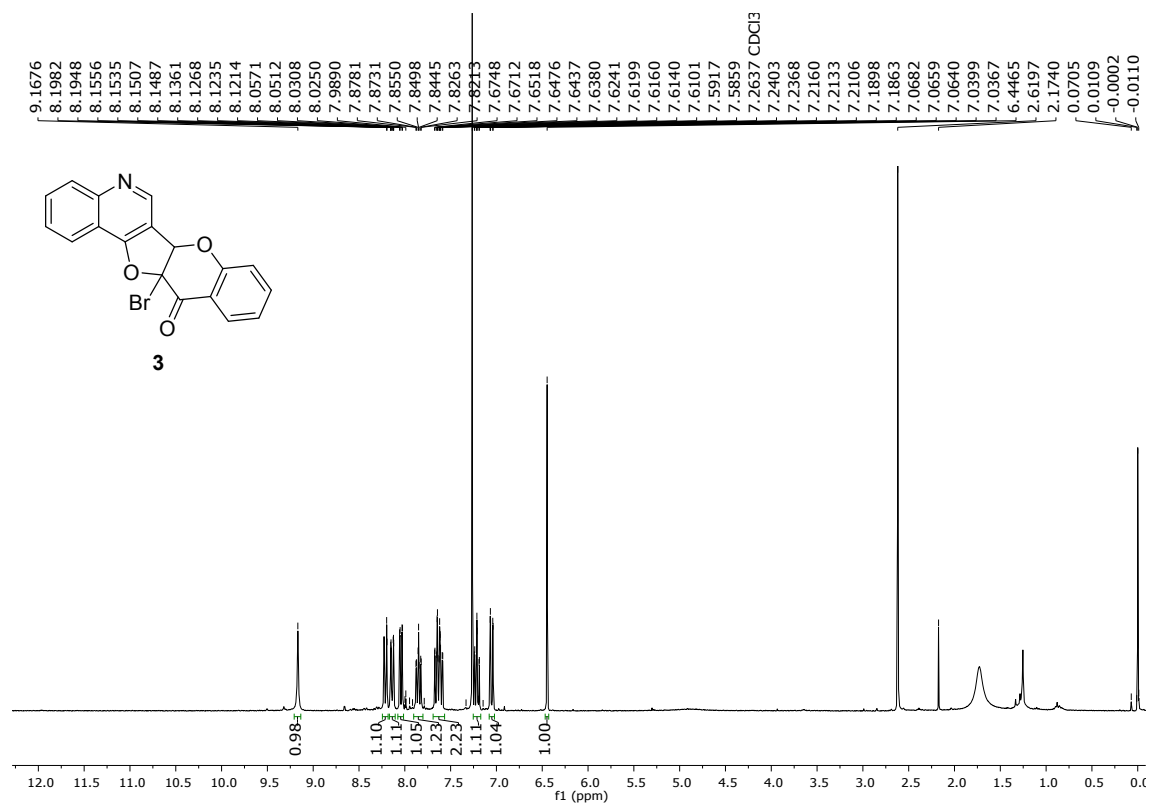

Figure S16.  $^1\text{H}$  NMR spectrum of compound **3** (300.13 MHz,  $\text{CDCl}_3$ )

\* Peaks at  $\delta$  30.9 ppm and 207.0 ppm are due to the presence of acetone since the spectrum was acquired before drying the compound in the vacuum pump.

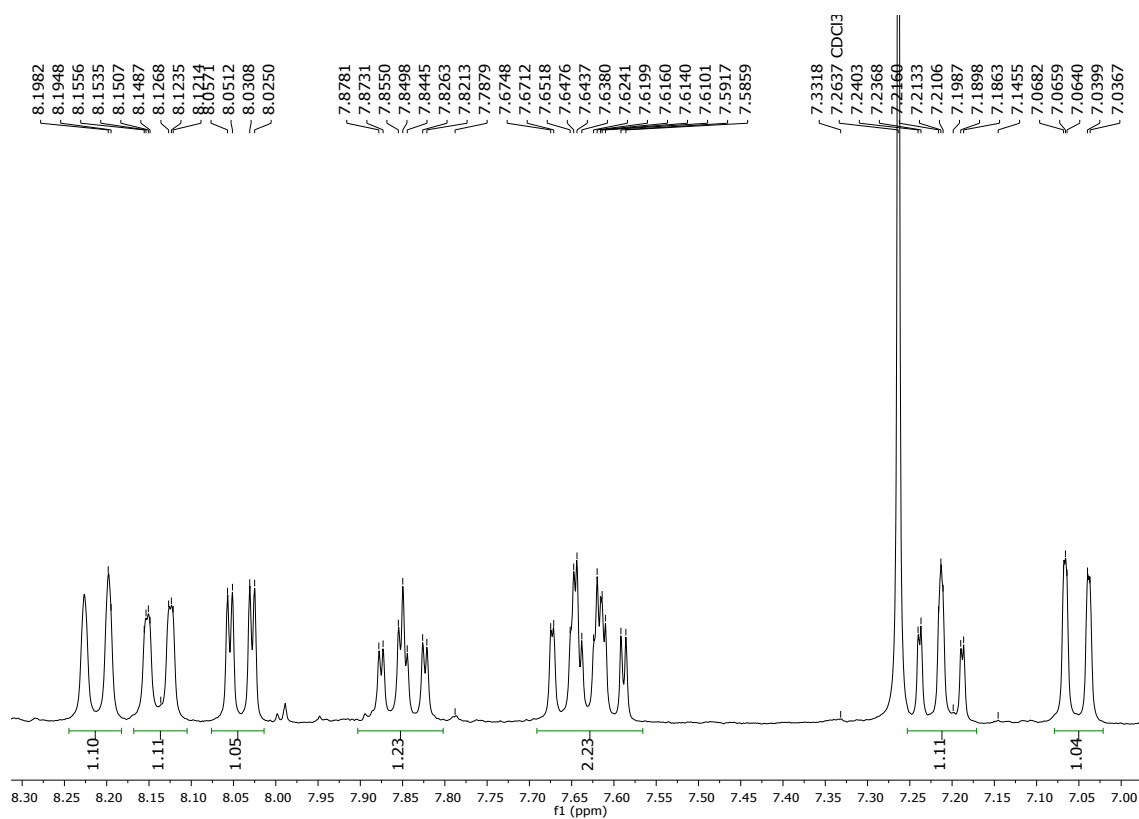

**Figure S17.** Expansion of  $^1\text{H}$  NMR spectrum of compound **3** (300.13 MHz,  $\text{CDCl}_3$ )

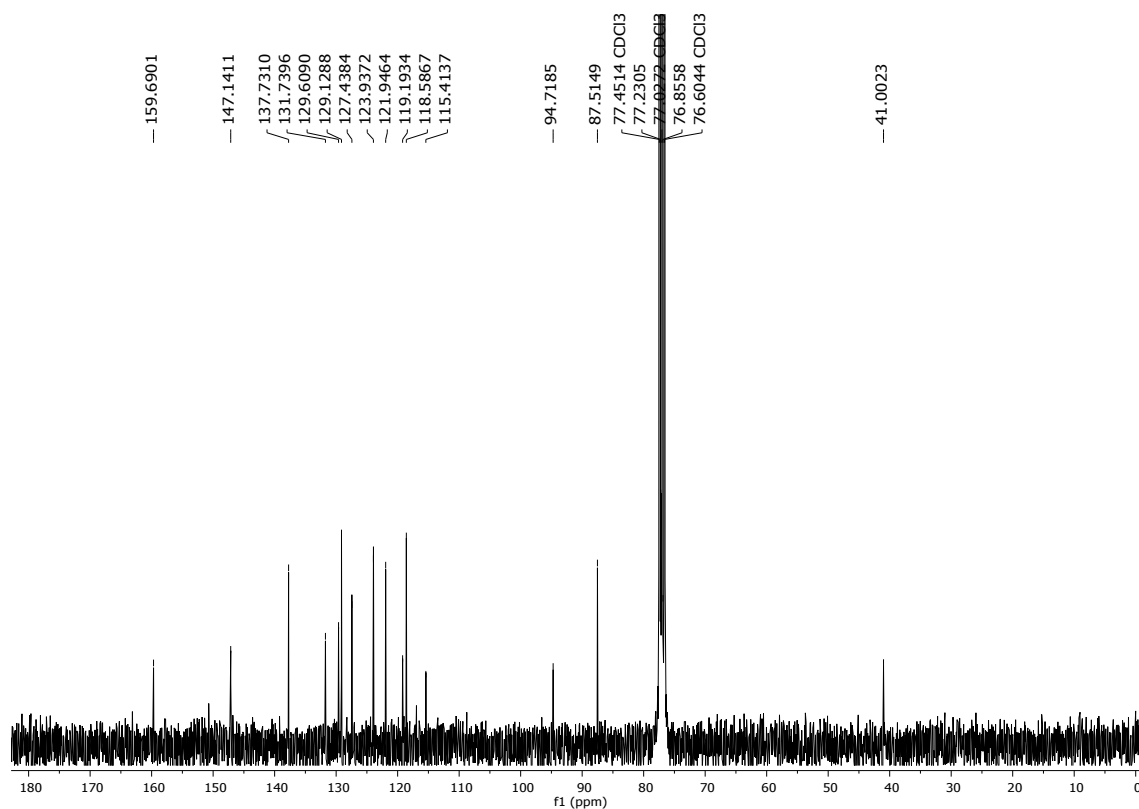

**Figure S18.**  $^{13}\text{C}$  NMR spectrum of compound **3** (75.47 MHz,  $\text{CDCl}_3$ )<sup>†</sup>

<sup>†</sup> The peak at  $\delta$ 41.0 ppm was not assigned to the compound since no correlations were observed for this signal in the 2D HSQC or HMBC spectra.

## 2. Single-Crystal X-Ray Diffraction Studies

### Experimental Section

Single crystals of compound 12a-bromo-6b,12a-dihydro-12*H*-chromeno[2',3':4,5]furo[3,2-*c*]quinolin-12-one (**3**) were manually harvested from an NMR tube and immersed in highly viscous FOMBLIN Y perfluoropolyether vacuum oil (LVAC 140/13, Sigma-Aldrich) to avoid degradation caused by the evaporation of the solvent.<sup>1</sup> Crystals were mounted on MiTeGen MicroLoops, typically with the help of a Stemi 2000 stereomicroscope equipped with Carl Zeiss lenses. X-ray diffraction data were collected at 150(2) K on a Bruker D8 QUEST equipped with Mo K $\alpha$  sealed tube ( $\lambda = 0.71073$  Å), a multilayer TRIUMPH X-ray mirror, a PHOTON 100 CMOS detector, and an Oxford Instruments Cryostrem 700+ Series low temperature device. Diffraction images were processed using the software package SAINT+,<sup>2</sup> and data were corrected for absorption by the multiscan semi-empirical method implemented in SADABS 2016/2.<sup>3</sup>

The structure was solved using the algorithm implemented in SHELXT-2014/5,<sup>4</sup> which allowed the immediate location of almost all of the heaviest atoms composing the molecular unit. The remaining missing and misplaced non-hydrogen atoms were located from difference Fourier maps calculated from successive full-matrix least-squares refinement cycles on  $F^2$  using the latest SHELXL from the 2018/3 release.<sup>5</sup> All structural refinements were performed using the graphical interface ShelXle.<sup>6</sup>

Hydrogen atoms bound to carbon were placed at their idealized positions using appropriate *HFIX* instructions in SHELXL: *43* (aromatic carbon atoms) and *13* (tertiary carbon atoms). These hydrogen atoms were included in subsequent refinement cycles with isotropic thermal displacements parameters ( $U_{\text{iso}}$ ) fixed at  $1.2 \times U_{\text{eq}}$  of the parent carbon atoms.

The last difference Fourier map synthesis showed the highest peak ( $0.518 \text{ e}\text{\AA}^{-3}$ ) and the deepest hole ( $-0.348 \text{ e}\text{\AA}^{-3}$ ) located at 1.01 and 0.84 Å from Br1, respectively. Structural drawings have been created using the software package Crystal Impact Diamond.<sup>7</sup>

*Crystal data for 3:*  $\text{C}_{18}\text{H}_{10}\text{BrNO}_3$ ,  $M = 368.18$ , monoclinic, space group  $P2_1/c$ ,  $Z = 4$ ,  $a = 15.6773(18) \text{ \AA}$ ,  $b = 6.7908(8) \text{ \AA}$ ,  $c = 15.3495(19) \text{ \AA}$ ,  $\beta = 118.405(4)^\circ$ ,  $V = 1437.4(3) \text{ \AA}^3$ ,  $\mu(\text{Mo-K}\alpha) = 2.875 \text{ mm}^{-1}$ ,  $D_c = 1.701 \text{ g cm}^{-3}$ , colourless plate with crystal size of  $0.21 \times 0.07 \times 0.02 \text{ mm}^3$ . Of a total of 25437 reflections collected, 2616 were independent ( $R_{\text{int}} = 0.0464$ ). Final  $R1 = 0.0251 [I > 2\sigma(I)]$  and  $wR2 = 0.0562$  (all data). Data completeness to  $\theta = 25.24^\circ$ , 99.7%. CCDC 1962713.

### 3. References

1. T. Kottke and D. Stalke, *J. Appl. Crystallogr.*, 1993, **26**, 615-619.
2. SAINT+, *Data Integration Engine v. 8.37a*©, 1997-2015, Bruker AXS, Madison, Wisconsin, USA.
3. L. Krause, R. Herbst-Irmer, G. M. Sheldrick and D. Stalke, *J. Appl. Crystallogr.*, 2015, **48**, 3-10.
4. G. M. Sheldrick, *Acta Cryst. A*, 2015, **71**, 3-8.
5. G. M. Sheldrick, *Acta Cryst. C*, 2015, **71**, 3-8.
6. C. B. Hübschle, G. M. Sheldrick and B. Dittrich, *J. Appl. Crystallogr.*, 2011, **44**, 1281-1284.
7. K. Brandenburg, *DIAMOND, Version 3.2f. Crystal Impact GbR, Bonn, Germany*, 1997-2010.
